# Supplementary material
Source: PubMed Central journal article supplement (PMC4784695)
Supplement: NIHMS678066-supplement-AppendixA.pdf [file NIHMS678066-supplement-AppendixA.pdf]

**Appendix 1: Association of individual metabolite components of the urea cycle related factor\* with CAD case status**

| Metabolite   | Mean (SD)   |             | Univariable analysis |        | Multivariable analysis** |      |
|--------------|-------------|-------------|----------------------|--------|--------------------------|------|
|              | Controls    | Cases       | OR (95% CI)          | P      | OR 95% CI                | P    |
| Citrulline   | 38.1 (14.5) | 42.0 (14.9) | 1.02 (1.01, 1.03)    | 0.0001 | 1.01 (1.00, 1.01)        | 0.18 |
| Arginine     | 65.2 (19.6) | 66.4 (20.4) | 1.00 (1.00, 1.01)    | 0.26   | 1.00 (1.00, 1.01)        | 0.43 |
| Histidine    | 58.9 (12.7) | 59.7 (12.8) | 1.01 (1.00, 1.01)    | 0.23   | 1.00 (0.99, 1.01)        | 0.88 |
| Ci4-DC/C4-DC | 0.07 (0.05) | 0.08 (0.05) | 63.51 (6.46, 624.66) | 0.0001 | 7.79 (0.80, 75.63)       | 0.08 |

\*Urea cycle factor from previous study by Shah et al.[29], with high factor loads for citrulline, arginine, histidine and Ci4-DC/C4-DC acylcarnitine.

\*\*Adjusted for age, race, sex, diabetes, hypertension, smoking, dyslipidemia, family history of CAD, and BMI.

**Appendix 2: Univariable and multivariable associations of PCA factors with number of diseased vessels**

| Factor    | Name                                                        | Univariable       |                   | Multivariable*    |               |
|-----------|-------------------------------------------------------------|-------------------|-------------------|-------------------|---------------|
|           |                                                             | $\beta$ , SE      | P value           | $\beta$ , SE      | P value       |
| 1         | Medium chain acylcarnitines                                 | 0.009, 0.02       | 0.67              | -0.009, 0.02      | 0.70          |
| 2         | Short chain dicarboxyl acylcarnitines                       | 0.05, 0.02        | 0.01              | 0.02, 0.02        | 0.29          |
| 3         | Long chain dicarboxyl acylcarnitines                        | 0.07, 0.02        | 0.0005            | 0.03, 0.02        | 0.13          |
|           | Ketone related                                              | 0.03, 0.02        | 0.19              | 0.01, 0.02        | 0.53          |
| 5         | Long chain acylcarnitines                                   | 0.03, 0.02        | 0.20              | -0.005, 0.02      | 0.84          |
| 6         | Branched chain amino acids & related metabolites            | 0.04, 0.02        | 0.05              | -0.02, 0.02       | 0.39          |
| <b>7</b>  | <b>Short chain acylcarnitines</b>                           | <b>0.12, 0.02</b> | <b>&lt;0.0001</b> | <b>0.08, 0.02</b> | <b>0.0003</b> |
| 8         | Amino acid factor                                           | 0.04, 0.02        | 0.05              | 0.03, 0.02        | 0.18          |
| 9         | Medium chain acylcarnitines                                 | 0.06, 0.02        | 0.003             | 0.03, 0.02        | 0.15          |
| <b>10</b> | <b>Branched chain amino acids &amp; related metabolites</b> | <b>0.05, 0.02</b> | <b>0.02</b>       | <b>0.05, 0.02</b> | <b>0.01</b>   |
| 11        | Misc                                                        | -0.02, 0.02       | 0.24              | 0.005, 0.02       | 0.80          |
| 12        | Non esterified fatty acids                                  | 0.03, 0.02        | 0.20              | 0.03, 0.02        | 0.25          |

\*Adjusted for age, race, sex, diabetes, hypertension, smoking, dyslipidemia, family history of CAD, and BMI.
